# Supplementary material for: FeSiCr–RIP/CIP Soft-Magnetic Composites: Microstructure (EBSD-KAM), Core Loss, and DC-Bias for Molded Inductors
Source: Research Square preprint supplement (doi:10.21203/rs.3.rs-7965248/v1), 2025-11-10
Supplement: Supplementary file 1 [file 756c37bc02b16486f521c4f9.docx]

Table S1. XRF compositions of raw powders (wt%).

| Powder | Fe (wt%) | Si (wt%) | Cr (wt%) | P (wt%) | Remarks |
| --- | --- | --- | --- | --- | --- |
| FeSiCr (matrix) | 88.5 | 5.1 | 6.1 | — | Fe–Si–Cr solid solution |
| RIP (SiO₂-coated) | > 98 | trace | — | — | Si from silica shell |
| CIP (SiO₂-coated) | > 98 | trace | — | — | Si from silica shell |
| CIP-P (phosphate-coated) | > 98 | — | — | trace | P from phosphate shell |


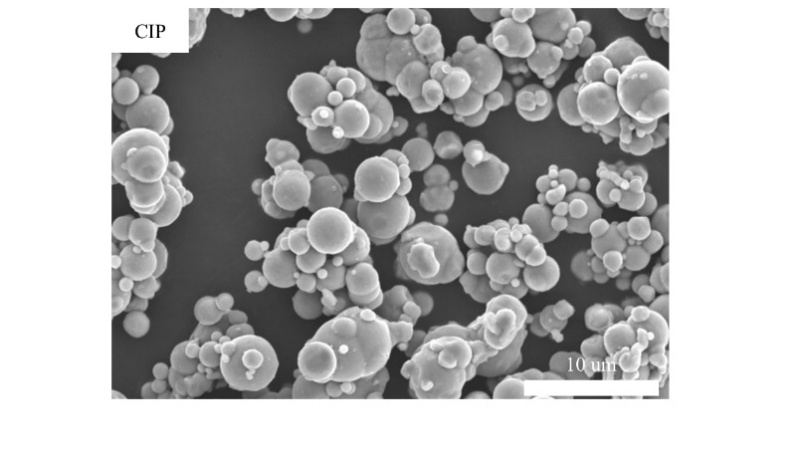

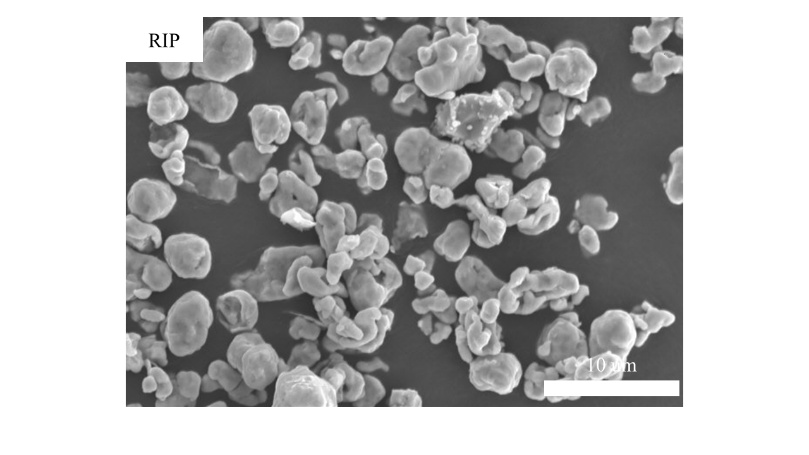


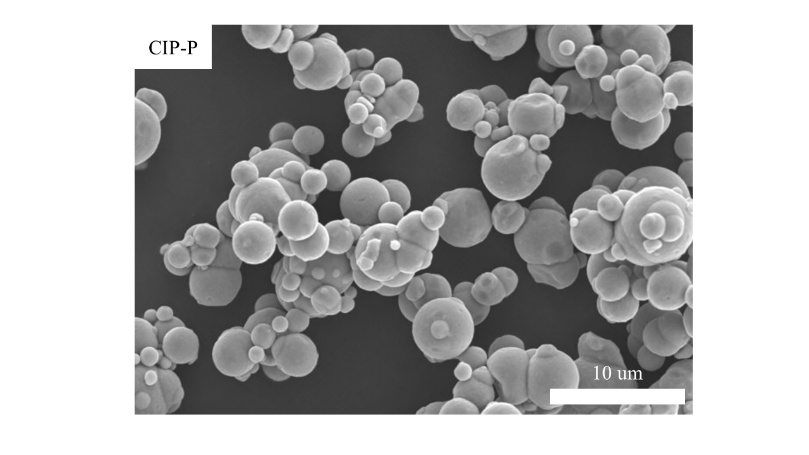

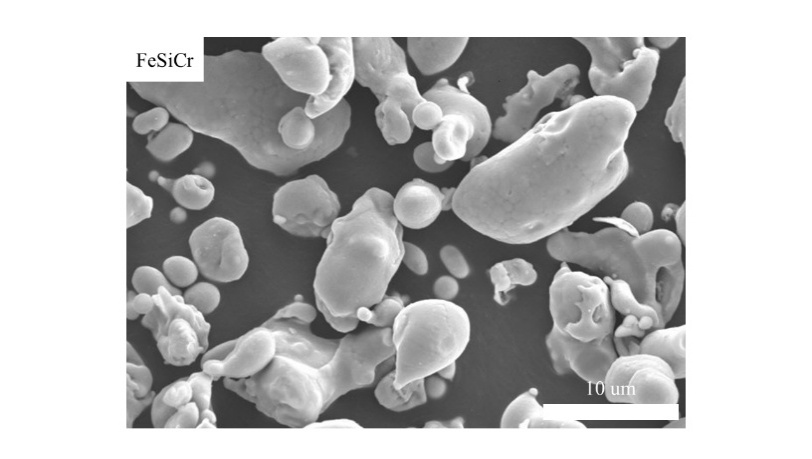


Fig.S1 SEM images of the raw materials.
